# Supplementary material for: Distribution and evolution of the western European water frogs (genus Pelophylax) from Catalonia, northeastern Spain
Source: PeerJ. 2025 Sep 22;13:e19895. doi: 10.7717/peerj.19895 (PMC12462689; doi:10.7717/peerj.19895)
Supplement: Supplemental Information 1 — In the column Haplotypes, sequences in bold represent representative sequences of the haplotype used in the mitochondrial phylogenetic reconstruction (see Fig. 5). [file peerj-13-19895-s001.xlsx]

## Sheet:  pelo original
Table S1. List of all specimens used in this study, including their locality, sex, life stage, morphological and genetic identification, as well as their accession number for the mitochondrial cytochrom-b marker. In the column Haplotypes, sequences in bold represent representative sequences of the haplotype used in the mitochondrial phylogenetic reconstruction (see Fig. 5).
Locality	Specimen Code	Latitude	Longitude	Locality	Sex	Stage	Morphology	Genetics Step-1	Genetics Step-2	Morphology-Genetics Agreement	Haplotypes and accession codes
P02	CN12431	41.6458	2.53781	Parc del Montnegre-Corredor	Male	Adult	P. perezi	P. perezi or P. lessonae	P. perezi	YES	-
P03	CN12402	41.6458	2.53781	Parc del Montnegre-Corredor		Juvenile	P. perezi	P. perezi or P. lessonae	P. perezi	YES	-
P04	CN11467	41.2786	1.67305	Parc del Foix	Female	Adult	Pelophylax sp.	P. perezi or P. lessonae	P. perezi		-
P04	CN11497	41.2786	1.67305	Parc del Foix		Juvenile	Pelophylax sp.	P. perezi or P. lessonae	P. perezi		-
P04	CN11538	41.2786	1.67305	Parc del Foix		Juvenile	Pelophylax sp.	P. perezi or P. lessonae	P. perezi		-
P05	CN11500	41.9992	3.18851	Pals		Juvenile	Pelophylax sp.	PK or P. kl. grafi or P. kl. esculentus	P. kl. grafi		H1
P05	CN11479	41.9992	3.18851	Pals		Juvenile	Pelophylax sp.	Undetermined	P. kl. grafi		-
P05	CN11504	41.9992	3.18851	Pals		Juvenile	Pelophylax sp.	PK or P. kl. grafi or P. kl. esculentus	P. kl. grafi		H1
P05	CN11528	41.9992	3.18851	Pals		Juvenile	Pelophylax sp.	PK or P. kl. grafi or P. kl. esculentus	P. kl. grafi		H1
P05	CN11509	41.9992	3.18851	Pals		Juvenile	Pelophylax sp.	P. perezi or P. lessonae	P. perezi		-
P05	CN12434	41.9992	3.18851	Pals		Juvenile	Pelophylax sp.	PK or P. kl. grafi or P. kl. esculentus	P. kl. grafi		H1
P05	CN12462	41.9992	3.18851	Pals		Juvenile	Pelophylax sp.	PK or P. kl. grafi or P. kl. esculentus	P. kl. grafi		H1
P06	CN11510	41.6652	2.53074	Parc del Montnegre-Corredor		Juvenile	Pelophylax sp.	Undetermined	P. kl. grafi		H1
P07	CN12428	41.6626	2.52632	Parc del Montnegre-Corredor	Male	Adult	P. kl. grafi	PK or P. kl. grafi or P. kl. esculentus	P. kl. grafi	YES	H1
P08	CN12438	41.6389	2.54801	Parc del Montnegre-Corredor	Male	Adult	P. kl. grafi	Undetermined	P. kl. grafi	YES	H1
P09	CN12426	41.8225	2.12558	Moià	Male	Adult	P. kl. grafi	Undetermined	P. kl. grafi	YES	H1
P10	CN12380	41.8223	2.12051	Moià		Tadpole	Pelophylax sp.	PK or P. kl. grafi or P. kl. esculentus	P. kl. grafi		H1
P05	CN12373	41.9992	3.18851	Pals		Juvenile	Pelophylax sp.	PK or P. kl. grafi or P. kl. esculentus	P. kl. grafi		H2 (PQ871184)
P19	CN11529	40.7389	0.37456	Mas de Barberans	Female	Adult	P. perezi	PK or P. kl. grafi or P. kl. esculentus	P. kl. grafi	NO	H1
P19	CN12187	40.7389	0.37456	Mas de Barberans		Juvenile	P. kl. grafi	PK or P. kl. grafi or P. kl. esculentus	P. kl. grafi	YES	H1
P19	CN12196	40.7389	0.37456	Mas de Barberans		Juvenile	P. perezi	Undetermined	P. kl. grafi	NO	H1
P19	CN12210	40.7389	0.37456	Mas de Barberans		Juvenile	P. perezi	PK or P. kl. grafi or P. kl. esculentus	P. kl. grafi	NO	H1
P19	CN12215	40.7389	0.37456	Mas de Barberans		Juvenile	P. kl. grafi	PK or P. kl. grafi or P. kl. esculentus	P. kl. grafi	YES	H1
P19	CN12376	40.7389	0.37456	Mas de Barberans		Juvenile	P. perezi	PK or P. kl. grafi or P. kl. esculentus	P. kl. grafi	NO	H1
P01	CN12416	41.3301	2.10332	El Prat del Llobregat	Female	Adult	P. perezi	P. perezi or P. lessonae	P. perezi	YES	-
P19	CN12441	40.7389	0.37456	Mas de Barberans	Female	Adult	P. perezi	PK or P. kl. grafi or P. kl. esculentus	P. kl. grafi	NO	H1
P01	CN12430	41.3301	2.10332	El Prat del Llobregat	Female	Adult	P. perezi	P. perezi or P. lessonae	P. perezi	YES	-
P19	CN12453	40.7389	0.37456	Mas de Barberans		Juvenile	P. perezi	PK or P. kl. grafi or P. kl. esculentus	P. kl. grafi	NO	H1
P19	CN12464	40.7389	0.37456	Mas de Barberans	Female	Adult	P. kl. grafi	PK or P. kl. grafi or P. kl. esculentus	P. kl. grafi	YES	H1
P19	CN12501	40.7389	0.37456	Mas de Barberans		Juvenile	P. perezi	PK or P. kl. grafi or P. kl. esculentus	P. kl. grafi	NO	H1
P25	CN12250	41.4975	1.81401	Masquefa	Male	Adult	P. perezi	PK or P. kl. grafi or P. kl. esculentus	P. kl. grafi	NO	H1
P11	CN11465	41.7687	2.13382	Castellcir		Juvenile	Pelophylax sp.	P. perezi or P. lessonae	P. perezi		-
P11	CN11508	41.7687	2.13382	Castellcir		Tadpole	Pelophylax sp.	P. perezi or P. lessonae	P. perezi		-
P11	CN12375	41.7687	2.13382	Castellcir		Tadpole	Pelophylax sp.	P. perezi or P. lessonae	P. perezi		-
P11	CN12437	41.7687	2.13382	Castellcir		Juvenile	Pelophylax sp.	P. perezi or P. lessonae	P. perezi		-
P26	CN11512	41.5285	2.16463	Santa Perpètua de Mogoda		Juvenile	P. perezi	PK or P. kl. grafi or P. kl. esculentus	P. kl. grafi	NO	H1
P12	CN11463	41.2857	1.94791	Parc del Garraf, Gavà, La Pedrera	Male	Adult	P. perezi	P. perezi or P. lessonae	P. perezi	YES	-
P12	CN11474	41.2857	1.94791	Parc del Garraf, Gavà, La Pedrera	Male	Adult	Pelophylax sp.	P. perezi or P. lessonae	P. perezi		-
P12	CN11494	41.2857	1.94791	Parc del Garraf, Gavà, La Pedrera	Male	Adult	P. perezi	P. perezi or P. lessonae	P. perezi	YES	-
P12	CN11495	41.2857	1.94791	Parc del Garraf, Gavà, La Pedrera	Female	Adult	P. perezi	P. perezi or P. lessonae	P. perezi	YES	-
P12	CN11503	41.2857	1.94791	Parc del Garraf, Gavà, La Pedrera	Male	Adult	P. perezi	P. perezi or P. lessonae	P. perezi	YES	-
P12	CN11505	41.2857	1.94791	Parc del Garraf, Gavà, La Pedrera	Male	Adult	P. perezi	P. perezi or P. lessonae	P. perezi	YES	-
P12	CN11519	41.2857	1.94791	Parc del Garraf, Gavà, La Pedrera	Male	Adult	P. perezi	P. perezi or P. lessonae	P. perezi	YES	-
P12	CN11521	41.2857	1.94791	Parc del Garraf, Gavà, La Pedrera	Female	Adult	P. perezi	P. perezi or P. lessonae	P. perezi	YES	-
P12	CN11522	41.2857	1.94791	Parc del Garraf, Gavà, La Pedrera	Male	Adult	P. perezi	P. perezi or P. lessonae	P. perezi	YES	-
P13	CN11466	41.2857	1.94792	Parc d'Olèrdola, Fontanilles	Female	Adult	Pelophylax sp.	P. perezi or P. lessonae	P. perezi		-
P26	CN12221	41.5285	2.16463	Santa Perpètua de Mogoda	Male	Adult	P. perezi	PK or P. kl. grafi or P. kl. esculentus	P. kl. grafi	NO	H1
P14	CN11478	41.1782	1.3287	Catllar		Juvenile	P. perezi	P. perezi or P. lessonae	P. perezi	YES	-
P14	CN11536	41.1782	1.3287	Catllar		Juvenile	P. perezi	P. perezi or P. lessonae	P. perezi	YES	-
P14	CN12506	41.1782	1.3287	Catllar		Juvenile	P. perezi	P. perezi or P. lessonae	P. perezi	YES	-
P15	CN11496	41.1164	1.227	Tarragona	Male	Adult	Pelophylax sp.	P. perezi or P. lessonae	P. perezi		-
P15	CN11502	41.1164	1.227	Tarragona		Juvenile	P. perezi	P. perezi or P. lessonae	P. perezi	YES	-
P15	CN12407	41.1164	1.227	Tarragona	Female	Adult	P. perezi	P. perezi or P. lessonae	P. perezi	YES	-
P15	CN12449	41.1164	1.227	Tarragona		Juvenile	P. perezi	P. perezi or P. lessonae	P. perezi	YES	-
P15	CN12459	41.1164	1.227	Tarragona		Juvenile	P. perezi	P. perezi or P. lessonae	P. perezi	YES	-
P15	CN12500	41.1164	1.227	Tarragona	Male	Adult	P. perezi	P. perezi or P. lessonae	P. perezi	YES	-
P16	CN11462	41.2166	1.03563	Vilaplana		Juvenile	P. perezi	P. perezi or P. lessonae	P. perezi	YES	-
P16	CN11476	41.2166	1.03563	Vilaplana	Male	Adult	Pelophylax sp.	P. perezi or P. lessonae	P. perezi		-
P16	CN11498	41.2166	1.03563	Vilaplana		Juvenile	P. perezi	P. perezi or P. lessonae	P. perezi	YES	-
P16	CN11533	41.2166	1.03563	Vilaplana	Female	Adult	P. perezi	P. perezi or P. lessonae	P. perezi	YES	-
P16	CN11541	41.2166	1.03563	Vilaplana		Juvenile	P. perezi	P. perezi or P. lessonae	P. perezi	YES	-
P16	CN12390	41.2166	1.03563	Vilaplana		Juvenile	P. perezi	P. perezi or P. lessonae	P. perezi	YES	-
P16	CN12408	41.2166	1.03563	Vilaplana	Female	Adult	P. perezi	P. perezi or P. lessonae	P. perezi	YES	-
P16	CN12415	41.2166	1.03563	Vilaplana		Juvenile	P. perezi	P. perezi or P. lessonae	P. perezi	YES	-
P17	CN11473	41.0528	0.87339	Pratdip		Tadpole	Pelophylax sp.	P. perezi or P. lessonae	P. perezi		-
P17	CN11511	41.0528	0.87339	Pratdip		Tadpole	Pelophylax sp.	P. perezi or P. lessonae	P. perezi		-
P17	CN11523	41.0528	0.87339	Pratdip		Tadpole	Pelophylax sp.	P. perezi or P. lessonae	P. perezi		-
P17	CN11526	41.0528	0.87339	Pratdip		Tadpole	Pelophylax sp.	P. perezi or P. lessonae	P. perezi		-
P17	CN12440	41.0528	0.87339	Pratdip		Tadpole	Pelophylax sp.	P. perezi or P. lessonae	P. perezi		-
P18	CN11458	40.6267	0.65322	Parc Natural del Delta del Ebre, Poblenou del Delta		Juvenile	P. perezi	P. perezi or P. lessonae	P. perezi	YES	-
P26	CN12243	41.5285	2.16463	Santa Perpètua de Mogoda		Tadpole	Pelophylax sp.	PK or P. kl. grafi or P. kl. esculentus	P. kl. grafi		H1
P18	CN11507	40.6267	0.65322	Parc Natural del Delta del Ebre, Poblenou del Delta		Juvenile	P. perezi	P. perezi or P. lessonae	P. perezi	YES	-
P18	CN12444	40.6267	0.65322	Parc Natural del Delta del Ebre, Poblenou del Delta		Juvenile	P. perezi	P. perezi or P. lessonae	P. perezi	YES	-
P18	CN12505	40.6267	0.65322	Parc Natural del Delta del Ebre, Poblenou del Delta		Juvenile	P. perezi	P. perezi or P. lessonae	P. perezi	YES	-
P26	CN12246	41.5285	2.16463	Santa Perpètua de Mogoda		Juvenile	P. kl. grafi	PK or P. kl. grafi or P. kl. esculentus	P. kl. grafi	YES	H1
P26	CN12247	41.5285	2.16463	Santa Perpètua de Mogoda		Juvenile	P. perezi	PK or P. kl. grafi or P. kl. esculentus	P. kl. grafi	NO	H1
P26	CN12252	41.5285	2.16463	Santa Perpètua de Mogoda		Tadpole	Pelophylax sp.	PK or P. kl. grafi or P. kl. esculentus	P. kl. grafi		H1
P19	CN12145	40.7389	0.37456	Mas de Barberans		Juvenile	P. perezi	PK or P. kl. grafi or P. kl. esculentus	P. kl. grafi	NO	-
P19	CN12186	40.7389	0.37456	Mas de Barberans		Juvenile	P. perezi	PK or P. kl. grafi or P. kl. esculentus	P. kl. grafi	NO	-
P26	CN12258	41.5285	2.16463	Santa Perpètua de Mogoda		Tadpole	Pelophylax sp.	PK or P. kl. grafi or P. kl. esculentus	P. kl. grafi		H1
P19	CN12188	40.7389	0.37456	Mas de Barberans		Juvenile	Pelophylax sp.	PK or P. kl. grafi or P. kl. esculentus	P. kl. grafi		-
P19	CN12193	40.7389	0.37456	Mas de Barberans		Juvenile	P. perezi	PK or P. kl. grafi or P. kl. esculentus	P. kl. grafi	NO	-
P19	CN12195	40.7389	0.37456	Mas de Barberans		Juvenile	Pelophylax sp.	PK or P. kl. grafi or P. kl. esculentus	P. kl. grafi		-
P26	CN12272	41.5285	2.16463	Santa Perpètua de Mogoda		Tadpole	Pelophylax sp.	PK or P. kl. grafi or P. kl. esculentus	P. kl. grafi		H1
P19	CN12199	40.7389	0.37456	Mas de Barberans		Juvenile	P. perezi	PK or P. kl. grafi or P. kl. esculentus	P. kl. grafi	NO	-
P19	CN12205	40.7389	0.37456	Mas de Barberans		Juvenile	P. perezi	P. perezi or P. lessonae	P. perezi	YES	-
P26	CN12273	41.5285	2.16463	Santa Perpètua de Mogoda	Male	Adult	P. kl. grafi	PK or P. kl. grafi or P. kl. esculentus	P. kl. grafi	YES	H1
P26	CN12276	41.5285	2.16463	Santa Perpètua de Mogoda		Juvenile	P. perezi	PK or P. kl. grafi or P. kl. esculentus	P. kl. grafi	NO	H1
P19	CN12218	40.7389	0.37456	Mas de Barberans	Male	Adult	P. kl. grafi	PK or P. kl. grafi or P. kl. esculentus	P. kl. grafi	YES	-
P19	CN12219	40.7389	0.37456	Mas de Barberans		Juvenile	P. perezi	PK or P. kl. grafi or P. kl. esculentus	P. kl. grafi	NO	-
P19	CN12231	40.7389	0.37456	Mas de Barberans		Juvenile	P. perezi	P. perezi or P. lessonae	P. perezi	YES	-
P19	CN12237	40.7389	0.37456	Mas de Barberans		Juvenile	P. perezi	PK or P. kl. grafi or P. kl. esculentus	P. kl. grafi	NO	-
P19	CN12238	40.7389	0.37456	Mas de Barberans		Juvenile	P. perezi	PK or P. kl. grafi or P. kl. esculentus	P. kl. grafi	NO	-
P19	CN12241	40.7389	0.37456	Mas de Barberans		Juvenile	P. perezi	PK or P. kl. grafi or P. kl. esculentus	P. kl. grafi	NO	-
P19	CN12254	40.7389	0.37456	Mas de Barberans	Female	Adult	P. perezi	PK or P. kl. grafi or P. kl. esculentus	P. kl. grafi	NO	-
P19	CN12267	40.7389	0.37456	Mas de Barberans		Juvenile	P. perezi	PK or P. kl. grafi or P. kl. esculentus	P. kl. grafi	NO	-
P19	CN12268	40.7389	0.37456	Mas de Barberans		Juvenile	P. kl. grafi	PK or P. kl. grafi or P. kl. esculentus	P. kl. grafi	YES	-
P19	CN12274	40.7389	0.37456	Mas de Barberans		Juvenile	Pelophylax sp.	P. perezi or P. lessonae	P. perezi		-
P26	CN12277	41.5285	2.16463	Santa Perpètua de Mogoda		Juvenile	P. perezi	PK or P. kl. grafi or P. kl. esculentus	P. kl. grafi	NO	H1
P27	CN12102	41.7987	2.18148	Castellcir	Male	Adult	P. perezi	PK or P. kl. grafi or P. kl. esculentus	P. kl. grafi	NO	H1
P27	CN12121	41.7987	2.18148	Castellcir	Male	Adult	P. kl. grafi	PK or P. kl. grafi or P. kl. esculentus	P. kl. grafi	YES	H1
P27	CN12163	41.7987	2.18148	Castellcir		Juvenile	P. perezi	PK or P. kl. grafi or P. kl. esculentus	P. kl. grafi	NO	H1
P27	CN12180	41.7987	2.18148	Castellcir	Male	Adult	P. kl. grafi	PK or P. kl. grafi or P. kl. esculentus	P. kl. grafi	YES	H1
P20	CN12140	40.7073	0.16456	Fredes		Tadpole	Pelophylax sp.	P. perezi or P. lessonae	P. perezi		-
P20	CN12146	40.7073	0.16456	Fredes		Tadpole	Pelophylax sp.	P. perezi or P. lessonae	P. perezi		-
P20	CN12158	40.7073	0.16456	Fredes		Tadpole	Pelophylax sp.	P. perezi or P. lessonae	P. perezi		-
P20	CN12159	40.7073	0.16456	Fredes		Tadpole	Pelophylax sp.	P. perezi or P. lessonae	P. perezi		-
P20	CN12189	40.7073	0.16456	Fredes		Tadpole	Pelophylax sp.	P. perezi or P. lessonae	P. perezi		-
P20	CN12191	40.7073	0.16456	Fredes		Tadpole	Pelophylax sp.	P. perezi or P. lessonae	P. perezi		-
P20	CN12197	40.7073	0.16456	Fredes		Tadpole	Pelophylax sp.	P. perezi or P. lessonae	P. perezi		-
P20	CN12200	40.7073	0.16456	Fredes		Tadpole	Pelophylax sp.	P. perezi or P. lessonae	P. perezi		-
P20	CN12201	40.7073	0.16456	Fredes		Tadpole	Pelophylax sp.	P. perezi or P. lessonae	P. perezi		-
P20	CN12202	40.7073	0.16456	Fredes		Tadpole	Pelophylax sp.	P. perezi or P. lessonae	P. perezi		-
P20	CN12206	40.7073	0.16456	Fredes		Tadpole	Pelophylax sp.	P. perezi or P. lessonae	P. perezi		-
P20	CN12207	40.7073	0.16456	Fredes		Tadpole	Pelophylax sp.	P. perezi or P. lessonae	P. perezi		-
P20	CN12208	40.7073	0.16456	Fredes		Tadpole	Pelophylax sp.	P. perezi or P. lessonae	P. perezi		-
P20	CN12213	40.7073	0.16456	Fredes		Tadpole	Pelophylax sp.	P. perezi or P. lessonae	P. perezi		-
P20	CN12222	40.7073	0.16456	Fredes		Juvenile	P. perezi	P. perezi or P. lessonae	P. perezi	YES	-
P20	CN12226	40.7073	0.16456	Fredes		Tadpole	Pelophylax sp.	P. perezi or P. lessonae	P. perezi		-
P20	CN12227	40.7073	0.16456	Fredes		Tadpole	Pelophylax sp.	P. perezi or P. lessonae	P. perezi		-
P20	CN12230	40.7073	0.16456	Fredes		Tadpole	Pelophylax sp.	P. perezi or P. lessonae	P. perezi		-
P20	CN12235	40.7073	0.16456	Fredes		Tadpole	Pelophylax sp.	P. perezi or P. lessonae	P. perezi		-
P20	CN12245	40.7073	0.16456	Fredes		Tadpole	Pelophylax sp.	P. perezi or P. lessonae	P. perezi		-
P20	CN12255	40.7073	0.16456	Fredes		Tadpole	Pelophylax sp.	P. perezi or P. lessonae	P. perezi		-
P20	CN12259	40.7073	0.16456	Fredes		Tadpole	Pelophylax sp.	P. perezi or P. lessonae	P. perezi		-
P21	CN12194	41.1944	0.82589	Torroja del Priorat		Tadpole	Pelophylax sp.	P. perezi or P. lessonae	P. perezi		-
P21	CN12214	41.1944	0.82589	Torroja del Priorat	Female	Adult	P. perezi	P. perezi or P. lessonae	P. perezi	YES	-
P21	CN12225	41.1944	0.82589	Torroja del Priorat		Juvenile	P. perezi	P. perezi or P. lessonae	P. perezi	YES	-
P21	CN12228	41.1944	0.82589	Torroja del Priorat		Tadpole	Pelophylax sp.	P. perezi or P. lessonae	P. perezi		-
P21	CN12229	41.1944	0.82589	Torroja del Priorat		Tadpole	Pelophylax sp.	P. perezi or P. lessonae	P. perezi		-
P21	CN12232	41.1944	0.82589	Torroja del Priorat		Juvenile	P. perezi	P. perezi or P. lessonae	P. perezi	YES	-
P21	CN12236	41.1944	0.82589	Torroja del Priorat	Female	Adult	P. perezi	P. perezi or P. lessonae	P. perezi	YES	-
P21	CN12240	41.1944	0.82589	Torroja del Priorat		Tadpole	Pelophylax sp.	P. perezi or P. lessonae	P. perezi		-
P22	CN12198	41.2788	1.67368	Parc del Foix, La Bubera		Juvenile	P. perezi	P. perezi or P. lessonae	P. perezi	YES	-
P22	CN12209	41.2788	1.67368	Parc del Foix, La Bubera		Juvenile	P. perezi	P. perezi or P. lessonae	P. perezi	YES	-
P22	CN12211	41.2788	1.67368	Parc del Foix, La Bubera		Tadpole	Pelophylax sp.	P. perezi or P. lessonae	P. perezi		-
P22	CN12216	41.2788	1.67368	Parc del Foix, La Bubera		Tadpole	Pelophylax sp.	P. perezi or P. lessonae	P. perezi		-
P22	CN12217	41.2788	1.67368	Parc del Foix, La Bubera		Tadpole	Pelophylax sp.	P. perezi or P. lessonae	P. perezi		-
P22	CN12244	41.2788	1.67368	Parc del Foix, La Bubera	Male	Adult	Pelophylax sp.	P. perezi or P. lessonae	P. perezi		-
P22	CN12253	41.2788	1.67368	Parc del Foix, La Bubera		Tadpole	Pelophylax sp.	P. perezi or P. lessonae	P. perezi		-
P22	CN12260	41.2788	1.67368	Parc del Foix, La Bubera	Female	Adult	P. perezi	P. perezi or P. lessonae	P. perezi	YES	-
P22	CN12271	41.2788	1.67368	Parc del Foix, La Bubera		Juvenile	P. perezi	P. perezi or P. lessonae	P. perezi	YES	-
P23	CN12212	41.2984	1.66207	Parc del Foix, La Sanabra		Juvenile	P. perezi	P. perezi or P. lessonae	P. perezi	YES	-
P23	CN12249	41.2984	1.66207	Parc del Foix, La Sanabra		Juvenile	P. perezi	P. perezi or P. lessonae	P. perezi	YES	-
P24	CN11470	41.5603	2.23089	Parets del Vallès	Male	Adult	Pelophylax sp.	P. perezi or P. lessonae	P. perezi		-
P27	CN12183	41.7987	2.18148	Castellcir	Male	Adult	P. kl. grafi	PK or P. kl. grafi or P. kl. esculentus	P. kl. grafi	YES	H1
P30	CN12128	41.8531	3.08243	Calonge	Female	Adult	P. kl. grafi	PK or P. kl. grafi or P. kl. esculentus	P. kl. grafi	YES	H1
P24	CN12239	41.5603	2.23089	Parets del Vallès		Juvenile	P. perezi	P. perezi or P. lessonae	P. perezi	YES	-
P31	CN12096	41.9992	3.18856	Pals	Female	Adult	P. perezi	PK or P. kl. grafi or P. kl. esculentus	P. kl. grafi	NO	H1
P31	CN12155	41.9992	3.18856	Pals		Juvenile	P. perezi	PK or P. kl. grafi or P. kl. esculentus	P. kl. grafi	NO	H1
P31	CN12166	41.9992	3.18856	Pals		Juvenile	Pelophylax sp.	PK or P. kl. grafi or P. kl. esculentus	P. kl. grafi		H1
P33	CN12115	42.3524	3.06675	Albera	Male	Adult	P. kl. grafi	PK or P. kl. grafi or P. kl. esculentus	P. kl. grafi	YES	H1
P33	CN12120	42.3524	3.06675	Albera		Tadpole	Pelophylax sp.	PK or P. kl. grafi or P. kl. esculentus	P. kl. grafi		H1
P33	CN12138	42.3524	3.06675	Albera	Female	Adult	P. kl. grafi	PK or P. kl. grafi or P. kl. esculentus	P. kl. grafi	YES	H1
P33	CN12143	42.3524	3.06675	Albera		Juvenile	P. perezi	PK or P. kl. grafi or P. kl. esculentus	P. kl. grafi	NO	H1
P33	CN12150	42.3524	3.06675	Albera	Male	Adult	P. kl. grafi	PK or P. kl. grafi or P. kl. esculentus	P. kl. grafi	YES	H1
P35	CN12973	42.451	2.93901	Requesens	Female	Adult	P. perezi	PK or P. kl. grafi or P. kl. esculentus	P. kl. grafi	NO	H1
P35	CN12990	42.451	2.93901	Requesens	Female	Adult	P. kl. grafi	PK or P. kl. grafi or P. kl. esculentus	P. kl. grafi	YES	H1
P35	CN13011	42.451	2.93901	Requesens	Female	Adult	P. kl. grafi	PK or P. kl. grafi or P. kl. esculentus	P. kl. grafi	YES	H1
P35	CN13135	42.451	2.93901	Requesens	Female	Adult	P. perezi	PK or P. kl. grafi or P. kl. esculentus	P. kl. grafi	NO	H1
P36	CN12137	42.1744	2.82366	Esponellà		Juvenile	Pelophylax sp.	PK or P. kl. grafi or P. kl. esculentus	P. kl. grafi		H1
P36	CN13049	42.1744	2.82366	Esponellà		Juvenile	Pelophylax sp.	PK or P. kl. grafi or P. kl. esculentus	P. kl. grafi		H1
P26	CN12129	41.5285	2.16463	Santa Perpètua de Mogoda		Juvenile	P. perezi	PK or P. kl. grafi or P. kl. esculentus	P. kl. grafi	NO	-
P26	CN12130	41.5285	2.16463	Santa Perpètua de Mogoda		Juvenile	P. perezi	PK or P. kl. grafi or P. kl. esculentus	P. kl. grafi	NO	-
P26	CN12147	41.5285	2.16463	Santa Perpètua de Mogoda	Female	Adult	P. perezi	PK or P. kl. grafi or P. kl. esculentus	P. kl. grafi	NO	-
P26	CN12156	41.5285	2.16463	Santa Perpètua de Mogoda		Juvenile	P. perezi	PK or P. kl. grafi or P. kl. esculentus	P. kl. grafi	NO	-
P26	CN12157	41.5285	2.16463	Santa Perpètua de Mogoda		Juvenile	P. perezi	PK or P. kl. grafi or P. kl. esculentus	P. kl. grafi	NO	-
P26	CN12178	41.5285	2.16463	Santa Perpètua de Mogoda	Male	Adult	P. kl. grafi	PK or P. kl. grafi or P. kl. esculentus	P. kl. grafi	YES	-
P26	CN12203	41.5285	2.16463	Santa Perpètua de Mogoda		Tadpole	Pelophylax sp.	PK or P. kl. grafi or P. kl. esculentus	P. kl. grafi		-
P36	CN13056	42.1744	2.82366	Esponellà		Juvenile	Pelophylax sp.	PK or P. kl. grafi or P. kl. esculentus	P. kl. grafi		H1
P26	CN12234	41.5285	2.16463	Santa Perpètua de Mogoda		Juvenile	P. perezi	PK or P. kl. grafi or P. kl. esculentus	P. kl. grafi	NO	-
P26	CN12242	41.5285	2.16463	Santa Perpètua de Mogoda		Tadpole	Pelophylax sp.	PK or P. kl. grafi or P. kl. esculentus	P. kl. grafi		-
P36	CN13096	42.1744	2.82366	Esponellà		Juvenile	Pelophylax sp.	PK or P. kl. grafi or P. kl. esculentus	P. kl. grafi		H1
P36	CN13099	42.1744	2.82366	Esponellà		Juvenile	Pelophylax sp.	PK or P. kl. grafi or P. kl. esculentus	P. kl. grafi		H1
P37	CN13054	42.3225	2.79006	Sant Llorenç de la Muga	Female	Adult	P. perezi	PK or P. kl. grafi or P. kl. esculentus	P. kl. grafi	NO	H1
P38	CN12991	42.2478	2.60437	Sadernes		Juvenile	Pelophylax sp.	PK or P. kl. grafi or P. kl. esculentus	P. kl. grafi		H1
P26	CN12256	41.5285	2.16463	Santa Perpètua de Mogoda	Male	Adult	P. perezi	P. perezi or P. lessonae	P. perezi	YES	-
P38	CN12995	42.2478	2.60437	Sadernes		Juvenile	Pelophylax sp.	PK or P. kl. grafi or P. kl. esculentus	P. kl. grafi		H1
P26	CN12262	41.5285	2.16463	Santa Perpètua de Mogoda		Juvenile	P. perezi	PK or P. kl. grafi or P. kl. esculentus	P. kl. grafi	NO	-
P26	CN12269	41.5285	2.16463	Santa Perpètua de Mogoda		Juvenile	P. perezi	PK or P. kl. grafi or P. kl. esculentus	P. kl. grafi	NO	-
P38	CN13006	42.2478	2.60437	Sadernes		Juvenile	Pelophylax sp.	PK or P. kl. grafi or P. kl. esculentus	P. kl. grafi		H1
P39	CN12971	42.1443	2.50826	Fageda d'en Jordà	Male	Adult	P. perezi	PK or P. kl. grafi or P. kl. esculentus	P. kl. grafi	NO	H1
P39	CN12972	42.1443	2.50826	Fageda d'en Jordà	Male	Adult	P. kl. grafi	PK or P. kl. grafi or P. kl. esculentus	P. kl. grafi	YES	H1
P39	CN12976	42.1443	2.50826	Fageda d'en Jordà	Male	Adult	P. kl. grafi	PK or P. kl. grafi or P. kl. esculentus	P. kl. grafi	YES	H1
P39	CN12980	42.1443	2.50826	Fageda d'en Jordà	Male	Adult	P. kl. grafi	PK or P. kl. grafi or P. kl. esculentus	P. kl. grafi	YES	H1
P39	CN12985	42.1443	2.50826	Fageda d'en Jordà	Male	Adult	P. perezi	PK or P. kl. grafi or P. kl. esculentus	P. kl. grafi	NO	H1
P27	CN12108	41.7987	2.18148	Castellcir		Juvenile	P. perezi	P. perezi or P. lessonae	P. perezi	YES	-
P27	CN12116	41.7987	2.18148	Castellcir	Male	Adult	P. perezi	P. perezi or P. lessonae	P. perezi	YES	-
P39	CN12986	42.1443	2.50826	Fageda d'en Jordà	Male	Adult	P. perezi	PK or P. kl. grafi or P. kl. esculentus	P. kl. grafi	NO	H1
P27	CN12122	41.7987	2.18148	Castellcir	Female	Adult	P. kl. grafi	P. perezi or P. lessonae	P. perezi	NO	-
P39	CN12987	42.1443	2.50826	Fageda d'en Jordà	Male	Adult	P. kl. grafi	PK or P. kl. grafi or P. kl. esculentus	P. kl. grafi	YES	H1
P27	CN12161	41.7987	2.18148	Castellcir	Female	Adult	P. perezi	P. perezi or P. lessonae	P. perezi	YES	-
P39	CN12996	42.1443	2.50826	Fageda d'en Jordà	Female	Adult	P. perezi	PK or P. kl. grafi or P. kl. esculentus	P. kl. grafi	NO	H1
P27	CN12167	41.7987	2.18148	Castellcir	Male	Adult	P. perezi	P. perezi or P. lessonae	P. perezi	YES	-
P39	CN12999	42.1443	2.50826	Fageda d'en Jordà	Male	Adult	P. perezi	PK or P. kl. grafi or P. kl. esculentus	P. kl. grafi	NO	H1
P27	CN12182	41.7987	2.18148	Castellcir	Female	Adult	P. perezi	P. perezi or P. lessonae	P. perezi	YES	-
P39	CN13003	42.1443	2.50826	Fageda d'en Jordà	Male	Adult	P. kl. grafi	PK or P. kl. grafi or P. kl. esculentus	P. kl. grafi	YES	H1
P28	CN12165	41.3936	2.04974	Sant Feliu de Llobregat	Male	Adult	P. perezi	P. perezi or P. lessonae	P. perezi	YES	-
P39	CN13004	42.1443	2.50826	Fageda d'en Jordà	Male	Adult	P. kl. grafi	PK or P. kl. grafi or P. kl. esculentus	P. kl. grafi	YES	H1
P29	CN12133	41.6538	2.76468	Malgrat de Mar	Female	Adult	P. perezi	P. perezi or P. lessonae	P. perezi	YES	-
P39	CN13005	42.1443	2.50826	Fageda d'en Jordà	Female	Adult	P. perezi	PK or P. kl. grafi or P. kl. esculentus	P. kl. grafi	NO	H1
P30	CN12110	41.8531	3.08243	Calonge	Male	Adult	P. perezi	P. perezi or P. lessonae	P. perezi	YES	-
P39	CN13008	42.1443	2.50826	Fageda d'en Jordà	Male	Adult	P. perezi	PK or P. kl. grafi or P. kl. esculentus	P. kl. grafi	NO	H1
P39	CN13009	42.1443	2.50826	Fageda d'en Jordà	Male	Adult	P. kl. grafi	PK or P. kl. grafi or P. kl. esculentus	P. kl. grafi	YES	H1
P31	CN12112	41.9992	3.18856	Pals		Juvenile	Pelophylax sp.	PK or P. kl. grafi or P. kl. esculentus	P. kl. grafi		-
P39	CN13047	42.1443	2.50826	Fageda d'en Jordà	Male	Adult	P. kl. grafi	PK or P. kl. grafi or P. kl. esculentus	P. kl. grafi	YES	H1
P39	CN13052	42.1443	2.50826	Fageda d'en Jordà	Male	Adult	P. kl. grafi	PK or P. kl. grafi or P. kl. esculentus	P. kl. grafi	YES	H1
P31	CN12131	41.9992	3.18856	Pals		Juvenile	P. perezi	P. perezi or P. lessonae	P. perezi	YES	-
P31	CN12144	41.9992	3.18856	Pals		Juvenile	Pelophylax sp.	P. perezi or P. lessonae	P. perezi		-
P42	CN13253	42.0062	1.21639	Baronia de Rialb	Female	Adult	P. kl. grafi	PK or P. kl. grafi or P. kl. esculentus	P. kl. grafi	YES	H1
P31	CN12154	41.9992	3.18856	Pals		Juvenile	Pelophylax sp.	PK or P. kl. grafi or P. kl. esculentus	P. kl. grafi		-
P44	CN13202	42.021	1.4908	Solsona	Male	Adult	P. perezi	PK or P. kl. grafi or P. kl. esculentus	P. kl. grafi	NO	H1
P44	CN13322	42.021	1.4908	Solsona	Male	Adult	P. kl. grafi	PK or P. kl. grafi or P. kl. esculentus	P. kl. grafi	YES	H1
P53	CN13256	41.6604	2.52494	Parc del Montegre-Corredor, El Garrell		Juvenile	P. perezi	PK or P. kl. grafi or P. kl. esculentus	P. kl. grafi	NO	H1
P53	CN13259	41.6604	2.52494	Parc del Montegre-Corredor, El Garrell	Male	Adult	P. kl. grafi	PK or P. kl. grafi or P. kl. esculentus	P. kl. grafi	YES	H1
P53	CN13261	41.6604	2.52494	Parc del Montegre-Corredor, El Garrell		Juvenile	P. kl. grafi	PK or P. kl. grafi or P. kl. esculentus	P. kl. grafi	YES	H1
P53	CN13353	41.6604	2.52494	Parc del Montegre-Corredor, El Garrell	Female	Adult	P. perezi	PK or P. kl. grafi or P. kl. esculentus	P. kl. grafi	NO	H1
P53	CN13359	41.6604	2.52494	Parc del Montegre-Corredor, El Garrell		Juvenile	P. perezi	PK or P. kl. grafi or P. kl. esculentus	P. kl. grafi	NO	H1
P53	CN13408	41.6604	2.52494	Parc del Montegre-Corredor, El Garrell	Male	Adult	P. perezi	PK or P. kl. grafi or P. kl. esculentus	P. kl. grafi	NO	H1
P32	CN12119	42.2245	3.09313	Aiguamolls del Empordà		Tadpole	Pelophylax sp.	PK or P. kl. grafi or P. kl. esculentus	P. kl. grafi		-
P53	CN13419	41.6604	2.52494	Parc del Montegre-Corredor, El Garrell	Male	Adult	P. kl. grafi	PK or P. kl. grafi or P. kl. esculentus	P. kl. grafi	YES	H1
P32	CN12132	42.2245	3.09313	Aiguamolls del Empordà		Juvenile	P. perezi	P. perezi or P. lessonae	P. perezi	YES	-
P32	CN12141	42.2245	3.09313	Aiguamolls del Empordà	Male	Adult	P. perezi	P. perezi or P. lessonae	P. perezi	YES	-
P53	CN13421	41.6604	2.52494	Parc del Montegre-Corredor, El Garrell	Male	Adult	P. perezi	PK or P. kl. grafi or P. kl. esculentus	P. kl. grafi	NO	H1
P32	CN12170	42.2245	3.09313	Aiguamolls del Empordà	Male	Adult	P. perezi	P. perezi or P. lessonae	P. perezi	YES	-
P32	CN12172	42.2245	3.09313	Aiguamolls del Empordà		Juvenile	P. perezi	PK or P. kl. grafi or P. kl. esculentus	P. kl. grafi	NO	-
P53	CN13424	41.6604	2.52494	Parc del Montegre-Corredor, El Garrell	Male	Adult	P. perezi	PK or P. kl. grafi or P. kl. esculentus	P. kl. grafi	NO	H1
P32	CN12220	42.2245	3.09313	Aiguamolls del Empordà		Juvenile	P. kl. grafi	PK or P. kl. grafi or P. kl. esculentus	P. kl. grafi	YES	-
P54	CN13460	41.6656	1.98974	Parc de Sant Llorenç del Munt, La Mata		Tadpole	Pelophylax sp.	PK or P. kl. grafi or P. kl. esculentus	P. kl. grafi		H1
P54	CN13471	41.6656	1.98974	Parc de Sant Llorenç del Munt, La Mata		Tadpole	Pelophylax sp.	PK or P. kl. grafi or P. kl. esculentus	P. kl. grafi		H1
P54	CN13472	41.6656	1.98974	Parc de Sant Llorenç del Munt, La Mata		Tadpole	Pelophylax sp.	PK or P. kl. grafi or P. kl. esculentus	P. kl. grafi		H1
P05	CN11477	41.9992	3.18851	Pals		Juvenile	Pelophylax sp.	PK or P. kl. grafi or P. kl. esculentus	P. kl. grafi		H20 (PQ871202)
P33	CN12134	42.3524	3.06675	Albera	Female	Adult	P. kl. grafi	PK or P. kl. grafi or P. kl. esculentus	P. kl. grafi	YES	-
P33	CN12135	42.3524	3.06675	Albera	Male	Adult	P. kl. grafi	PK or P. kl. grafi or P. kl. esculentus	P. kl. grafi	YES	-
P43	CN13381	41.6396	0.55684	Lleida	Female	Adult	P. kl. grafi	PK or P. kl. grafi or P. kl. esculentus	P. kl. grafi	YES	H10
P31	CN12152	41.9992	3.18856	Pals		Juvenile	Pelophylax sp.	PK or P. kl. grafi or P. kl. esculentus	P. kl. grafi		H11
P06	CN12503	41.6652	2.53074	Parc del Montnegre-Corredor		Juvenile	Pelophylax sp.	Undetermined	P. kl. grafi		H16 (PQ871198)
P33	CN12162	42.3524	3.06675	Albera	Female	Adult	P. perezi	PK or P. kl. grafi or P. kl. esculentus	P. kl. grafi	NO	-
P33	CN12168	42.3524	3.06675	Albera	Male	Adult	P. perezi	P. perezi or P. lessonae	P. perezi	YES	-
P32	CN12153	42.2245	3.09313	Aiguamolls del Empordà		Tadpole	Pelophylax sp.	PK or P. kl. grafi or P. kl. esculentus	P. kl. grafi		H11
P11	CN12463	41.7687	2.13382	Castellcir		Juvenile	Pelophylax sp.	Undetermined	P. kl. grafi		H12 (PQ871194)
P13	CN11540	41.2857	1.94792	Parc d'Olèrdola, Fontanilles	Female	Adult	P. perezi	PK or P. kl. grafi or P. kl. esculentus	P. kl. grafi	NO	H22 (PQ871204)
P32	CN12185	42.2245	3.09313	Aiguamolls del Empordà		Tadpole	Pelophylax sp.	PK or P. kl. grafi or P. kl. esculentus	P. kl. grafi		H13
P33	CN12400	42.3524	3.06675	Albera	Female	Adult	P. kl. grafi	PK or P. kl. grafi or P. kl. esculentus	P. kl. grafi	YES	-
P34	CN12978	42.4264	3.13603	Portbou		Juvenile	P. perezi	P. perezi or P. lessonae	P. perezi	YES	-
P34	CN13012	42.4264	3.13603	Portbou	Male	Adult	P. perezi	P. perezi or P. lessonae	P. perezi	YES	-
P34	CN13050	42.4264	3.13603	Portbou		Juvenile	P. perezi	P. perezi or P. lessonae	P. perezi	YES	-
P34	CN13051	42.4264	3.13603	Portbou		Juvenile	Pelophylax sp.	P. perezi or P. lessonae	P. perezi		-
P34	CN13055	42.4264	3.13603	Portbou	Male	Adult	P. perezi	P. perezi or P. lessonae	P. perezi	YES	-
P34	CN13104	42.4264	3.13603	Portbou		Juvenile	Pelophylax sp.	P. perezi or P. lessonae	P. perezi		-
P32	CN12265	42.2245	3.09313	Aiguamolls del Empordà		Tadpole	Pelophylax sp.	PK or P. kl. grafi or P. kl. esculentus	P. kl. grafi		H13
P35	CN12975	42.451	2.93901	Requesens	Male	Adult	P. kl. grafi	P. perezi or P. lessonae	P. perezi	NO	-
P32	CN12929	42.2245	3.09313	Aiguamolls del Empordà		Tadpole	Pelophylax sp.	PK or P. kl. grafi or P. kl. esculentus	P. kl. grafi		H13
P18	CN11468	40.6267	0.65322	Parc Natural del Delta del Ebre, Poblenou del Delta		Juvenile	Pelophylax sp.	PK or P. kl. grafi or P. kl. esculentus	P. kl. grafi		H19 (PQ871201)
P35	CN13098	42.451	2.93901	Requesens	Male	Adult	P. perezi	P. perezi or P. lessonae	P. perezi	YES	-
P54	CN13453	41.6656	1.98974	Parc de Sant Llorenç del Munt, La Mata		Tadpole	Pelophylax sp.	PK or P. kl. grafi or P. kl. esculentus	P. kl. grafi		H14
P19	CN11457	40.7389	0.37456	Mas de Barberans		Juvenile	P. perezi	PK or P. kl. grafi or P. kl. esculentus	P. kl. grafi	NO	H1 (PQ871183)
P33	CN12264	42.3524	3.06675	Albera		Tadpole	Pelophylax sp.	PK or P. kl. grafi or P. kl. esculentus	P. kl. grafi		H15
P36	CN13007	42.1744	2.82366	Esponellà	Male	Adult	P. perezi	P. perezi or P. lessonae	P. perezi	YES	-
P36	CN13010	42.1744	2.82366	Esponellà	Male	Adult	P. perezi	P. perezi or P. lessonae	P. perezi	YES	-
P36	CN13043	42.1744	2.82366	Esponellà	Male	Adult	P. perezi	P. perezi or P. lessonae	P. perezi	YES	-
P36	CN13044	42.1744	2.82366	Esponellà		Juvenile	Pelophylax sp.	P. perezi or P. lessonae	P. perezi		-
P36	CN13045	42.1744	2.82366	Esponellà		Juvenile	Pelophylax sp.	P. perezi or P. lessonae	P. perezi		-
P19	CN11569	40.7389	0.37456	Mas de Barberans		Juvenile	P. perezi	PK or P. kl. grafi or P. kl. esculentus	P. kl. grafi	NO	H18 (PQ871200)
P36	CN13048	42.1744	2.82366	Esponellà	Male	Adult	P. perezi	P. perezi or P. lessonae	P. perezi	YES	-
P53	CN13264	41.6604	2.52494	Parc del Montegre-Corredor, El Garrell	Male	Adult	P. kl. grafi	PK or P. kl. grafi or P. kl. esculentus	P. kl. grafi	YES	H16
P53	CN13265	41.6604	2.52494	Parc del Montegre-Corredor, El Garrell		Juvenile	P. kl. grafi	PK or P. kl. grafi or P. kl. esculentus	P. kl. grafi	YES	H16
P53	CN13267	41.6604	2.52494	Parc del Montegre-Corredor, El Garrell	Male	Adult	P. kl. grafi	PK or P. kl. grafi or P. kl. esculentus	P. kl. grafi	YES	H16
P53	CN13269	41.6604	2.52494	Parc del Montegre-Corredor, El Garrell	Male	Adult	P. kl. grafi	PK or P. kl. grafi or P. kl. esculentus	P. kl. grafi	YES	H16
P36	CN13089	42.1744	2.82366	Esponellà	Male	Adult	P. perezi	P. perezi or P. lessonae	P. perezi	YES	-
P36	CN13091	42.1744	2.82366	Esponellà	Male	Adult	P. perezi	P. perezi or P. lessonae	P. perezi	YES	-
P36	CN13092	42.1744	2.82366	Esponellà		Juvenile	Pelophylax sp.	P. perezi or P. lessonae	P. perezi		-
P36	CN13093	42.1744	2.82366	Esponellà	Male	Adult	P. perezi	P. perezi or P. lessonae	P. perezi	YES	-
P36	CN13094	42.1744	2.82366	Esponellà	Male	Adult	P. perezi	P. perezi or P. lessonae	P. perezi	YES	-
P36	CN13095	42.1744	2.82366	Esponellà	Male	Adult	P. perezi	P. perezi or P. lessonae	P. perezi	YES	-
P53	CN13303	41.6604	2.52494	Parc del Montegre-Corredor, El Garrell	Male	Adult	P. perezi	PK or P. kl. grafi or P. kl. esculentus	P. kl. grafi	NO	H16
P53	CN13306	41.6604	2.52494	Parc del Montegre-Corredor, El Garrell	Male	Adult	P. kl. grafi	PK or P. kl. grafi or P. kl. esculentus	P. kl. grafi	YES	H16
P53	CN13310	41.6604	2.52494	Parc del Montegre-Corredor, El Garrell	Male	Adult	P. perezi	PK or P. kl. grafi or P. kl. esculentus	P. kl. grafi	NO	H16
P36	CN13101	42.1744	2.82366	Esponellà		Juvenile	Pelophylax sp.	P. perezi or P. lessonae	P. perezi		-
P36	CN13102	42.1744	2.82366	Esponellà	Male	Adult	P. perezi	P. perezi or P. lessonae	P. perezi	YES	-
P36	CN13105	42.1744	2.82366	Esponellà		Juvenile	Pelophylax sp.	P. perezi or P. lessonae	P. perezi		-
P53	CN13316	41.6604	2.52494	Parc del Montegre-Corredor, El Garrell	Male	Adult	P. kl. grafi	PK or P. kl. grafi or P. kl. esculentus	P. kl. grafi	YES	H16
P53	CN13317	41.6604	2.52494	Parc del Montegre-Corredor, El Garrell	Male	Adult	P. kl. grafi	PK or P. kl. grafi or P. kl. esculentus	P. kl. grafi	YES	H16
P53	CN13354	41.6604	2.52494	Parc del Montegre-Corredor, El Garrell	Male	Adult	P. perezi	PK or P. kl. grafi or P. kl. esculentus	P. kl. grafi	NO	H16
P53	CN13360	41.6604	2.52494	Parc del Montegre-Corredor, El Garrell	Male	Adult	P. kl. grafi	PK or P. kl. grafi or P. kl. esculentus	P. kl. grafi	YES	H16
P53	CN13361	41.6604	2.52494	Parc del Montegre-Corredor, El Garrell	Male	Adult	P. perezi	PK or P. kl. grafi or P. kl. esculentus	P. kl. grafi	NO	H16
P37	CN13097	42.3225	2.79006	Sant Llorenç de la Muga		Juvenile	Pelophylax sp.	P. perezi or P. lessonae	P. perezi		-
P38	CN12970	42.2478	2.60437	Sadernes	Male	Adult	P. perezi	P. perezi or P. lessonae	P. perezi	YES	-
P53	CN13362	41.6604	2.52494	Parc del Montegre-Corredor, El Garrell	Male	Adult	P. perezi	PK or P. kl. grafi or P. kl. esculentus	P. kl. grafi	NO	H16
P53	CN13413	41.6604	2.52494	Parc del Montegre-Corredor, El Garrell	Male	Adult	P. perezi	PK or P. kl. grafi or P. kl. esculentus	P. kl. grafi	NO	H16
P53	CN13414	41.6604	2.52494	Parc del Montegre-Corredor, El Garrell	Male	Adult	P. kl. grafi	PK or P. kl. grafi or P. kl. esculentus	P. kl. grafi	YES	H16
P53	CN13417	41.6604	2.52494	Parc del Montegre-Corredor, El Garrell	Male	Adult	P. perezi	PK or P. kl. grafi or P. kl. esculentus	P. kl. grafi	NO	H16
P53	CN13427	41.6604	2.52494	Parc del Montegre-Corredor, El Garrell	Male	Adult	P. kl. grafi	PK or P. kl. grafi or P. kl. esculentus	P. kl. grafi	YES	H16
P24	CN12190	41.5603	2.23089	Parets del Vallès	Female	Adult	P. perezi	PK or P. kl. grafi or P. kl. esculentus	P. kl. grafi	NO	H3 (PQ871185)
P01	CN12377	41.3301	2.10332	El Prat del Llobregat	Male	Adult	P. kl. grafi	PK or P. kl. grafi or P. kl. esculentus	P. kl. grafi	YES	H18
P01	CN12394	41.3301	2.10332	El Prat del Llobregat	Male	Adult	P. kl. grafi	PK or P. kl. grafi or P. kl. esculentus	P. kl. grafi	YES	H18
P01	CN12427	41.3301	2.10332	El Prat del Llobregat	Female	Adult	P. kl. grafi	PK or P. kl. grafi or P. kl. esculentus	P. kl. grafi	YES	H18
P01	CN12455	41.3301	2.10332	El Prat del Llobregat	Male	Adult	P. kl. grafi	PK or P. kl. grafi or P. kl. esculentus	P. kl. grafi	YES	H18
P31	CN12177	41.9992	3.18856	Pals	Female	Adult	P. perezi	PK or P. kl. grafi or P. kl. esculentus	P. kl. grafi	NO	H4 (PQ871186)
P31	CN12118	41.9992	3.18856	Pals		Juvenile	P. kl. grafi	PK or P. kl. grafi or P. kl. esculentus	P. kl. grafi	YES	H8 (PQ871190)
P32	CN12126	42.2245	3.09313	Aiguamolls del Empordà		Tadpole	Pelophylax sp.	PK or P. kl. grafi or P. kl. esculentus	P. kl. grafi		H11 (PQ871193)
P32	CN12109	42.2245	3.09313	Aiguamolls del Empordà		Tadpole	Pelophylax sp.	PK or P. kl. grafi or P. kl. esculentus	P. kl. grafi		H13 (PQ871195)
P33	CN12169	42.3524	3.06675	Albera		Tadpole	Pelophylax sp.	PK or P. kl. grafi or P. kl. esculentus	P. kl. grafi		H15 (PQ871197)
P01	CN12385	41.3301	2.10332	El Prat del Llobregat	Female	Adult	P. kl. grafi	PK or P. kl. grafi or P. kl. esculentus	P. kl. grafi	YES	H22
P01	CN12391	41.3301	2.10332	El Prat del Llobregat	Female	Adult	P. kl. grafi	PK or P. kl. grafi or P. kl. esculentus	P. kl. grafi	YES	H22
P01	CN12458	41.3301	2.10332	El Prat del Llobregat	Female	Adult	P. kl. grafi	PK or P. kl. grafi or P. kl. esculentus	P. kl. grafi	YES	H22
P01	CN12460	41.3301	2.10332	El Prat del Llobregat	Male	Adult	P. perezi	PK or P. kl. grafi or P. kl. esculentus	P. kl. grafi	NO	H22
P05	CN11532	41.9992	3.18851	Pals		Juvenile	Pelophylax sp.	PK or P. kl. grafi or P. kl. esculentus	P. kl. grafi		H22
P36	CN13100	42.1744	2.82366	Esponellà	Male	Adult	P. perezi	PK or P. kl. grafi or P. kl. esculentus	P. kl. grafi	NO	H17 (PQ871199)
P25	CN12204	41.4975	1.81401	Masquefa	Female	Adult	P. perezi	PK or P. kl. grafi or P. kl. esculentus	P. kl. grafi	NO	H22
P25	CN12224	41.4975	1.81401	Masquefa		Juvenile	P. perezi	PK or P. kl. grafi or P. kl. esculentus	P. kl. grafi	NO	H22
P25	CN12233	41.4975	1.81401	Masquefa	Female	Adult	P. kl. grafi	PK or P. kl. grafi or P. kl. esculentus	P. kl. grafi	YES	H22
P25	CN12251	41.4975	1.81401	Masquefa	Male	Adult	P. kl. grafi	PK or P. kl. grafi or P. kl. esculentus	P. kl. grafi	YES	H22
P25	CN12261	41.4975	1.81401	Masquefa	Female	Adult	P. kl. grafi	PK or P. kl. grafi or P. kl. esculentus	P. kl. grafi	YES	H22
P25	CN12405	41.4975	1.81401	Masquefa	Male	Adult	P. kl. grafi	PK or P. kl. grafi or P. kl. esculentus	P. kl. grafi	YES	H22
P25	CN12422	41.4975	1.81401	Masquefa	Male	Adult	P. perezi	PK or P. kl. grafi or P. kl. esculentus	P. kl. grafi	NO	H22
P27	CN12097	41.7987	2.18148	Castellcir	Female	Adult	P. perezi	PK or P. kl. grafi or P. kl. esculentus	P. kl. grafi	NO	H22
P44	CN13323	42.021	1.4908	Solsona	Female	Adult	P. perezi	P. perezi or P. lessonae	P. perezi	YES	-
P44	CN13363	42.021	1.4908	Solsona	Female	Adult	P. perezi	P. perezi or P. lessonae	P. perezi	YES	-
P45	CN13198	42.1085	1.02093	Tremp	Male	Adult	P. perezi	P. perezi or P. lessonae	P. perezi	YES	-
P45	CN13207	42.1085	1.02093	Tremp		Juvenile	Pelophylax sp.	P. perezi or P. lessonae	P. perezi		-
P45	CN13244	42.1085	1.02093	Tremp		Juvenile	Pelophylax sp.	P. perezi or P. lessonae	P. perezi		-
P45	CN13324	42.1085	1.02093	Tremp		Juvenile	Pelophylax sp.	P. perezi or P. lessonae	P. perezi		-
P45	CN13335	42.1085	1.02093	Tremp		Juvenile	Pelophylax sp.	P. perezi or P. lessonae	P. perezi		-
P45	CN13368	42.1085	1.02093	Tremp		Juvenile	P. perezi	P. perezi or P. lessonae	P. perezi	YES	-
P45	CN13373	42.1085	1.02093	Tremp	Male	Adult	P. perezi	P. perezi or P. lessonae	P. perezi	YES	-
P45	CN13377	42.1085	1.02093	Tremp		Juvenile	Pelophylax sp.	P. perezi or P. lessonae	P. perezi		-
P46	CN12988	42.715	0.77438	Vielha		Juvenile	P. perezi	PK or P. kl. grafi or P. kl. esculentus	P. kl. grafi	NO	-
P27	CN12124	41.7987	2.18148	Castellcir	Female	Adult	P. perezi	PK or P. kl. grafi or P. kl. esculentus	P. kl. grafi	NO	H22
P28	CN12175	41.3936	2.04974	Sant Feliu de Llobregat	Female	Adult	P. kl. grafi	PK or P. kl. grafi or P. kl. esculentus	P. kl. grafi	YES	H22
P29	CN12179	41.6538	2.76468	Malgrat de Mar	Female	Adult	P. perezi	PK or P. kl. grafi or P. kl. esculentus	P. kl. grafi	NO	H22
P46	CN13250	42.715	0.77438	Vielha		Juvenile	P. perezi	PK or P. kl. grafi or P. kl. esculentus	P. kl. grafi	NO	-
P31	CN12113	41.9992	3.18856	Pals		Juvenile	Pelophylax sp.	PK or P. kl. grafi or P. kl. esculentus	P. kl. grafi		H22
P46	CN13271	42.715	0.77438	Vielha		Juvenile	Pelophylax sp.	PK or P. kl. grafi or P. kl. esculentus	P. kl. grafi		-
P46	CN13274	42.715	0.77438	Vielha		Juvenile	Pelophylax sp.	PK or P. kl. grafi or P. kl. esculentus	P. kl. grafi		-
P46	CN13277	42.715	0.77438	Vielha		Juvenile	Pelophylax sp.	PK or P. kl. grafi or P. kl. esculentus	P. kl. grafi		-
P46	CN13321	42.715	0.77438	Vielha		Juvenile	Pelophylax sp.	PK or P. kl. grafi or P. kl. esculentus	P. kl. grafi		-
P46	CN13332	42.715	0.77438	Vielha		Juvenile	Pelophylax sp.	PK or P. kl. grafi or P. kl. esculentus	P. kl. grafi		-
P31	CN12160	41.9992	3.18856	Pals		Juvenile	Pelophylax sp.	PK or P. kl. grafi or P. kl. esculentus	P. kl. grafi		H22
P46	CN13369	42.715	0.77438	Vielha		Juvenile	Pelophylax sp.	PK or P. kl. grafi or P. kl. esculentus	P. kl. grafi		-
P32	CN12094	42.2245	3.09313	Aiguamolls del Empordà		Tadpole	Pelophylax sp.	PK or P. kl. grafi or P. kl. esculentus	P. kl. grafi		H22
P32	CN12098	42.2245	3.09313	Aiguamolls del Empordà		Tadpole	Pelophylax sp.	PK or P. kl. grafi or P. kl. esculentus	P. kl. grafi		H22
P32	CN12101	42.2245	3.09313	Aiguamolls del Empordà		Tadpole	Pelophylax sp.	PK or P. kl. grafi or P. kl. esculentus	P. kl. grafi		H22
P47	CN13205	42.3996	0.74247	Pont de Suert		Tadpole	Pelophylax sp.	P. perezi or P. lessonae	P. perezi		-
P47	CN13208	42.3996	0.74247	Pont de Suert	Male	Adult	P. perezi	P. perezi or P. lessonae	P. perezi	YES	-
P47	CN13246	42.3996	0.74247	Pont de Suert	Male	Adult	P. perezi	P. perezi or P. lessonae	P. perezi	YES	-
P47	CN13249	42.3996	0.74247	Pont de Suert		Tadpole	Pelophylax sp.	P. perezi or P. lessonae	P. perezi		-
P47	CN13275	42.3996	0.74247	Pont de Suert		Tadpole	Pelophylax sp.	P. perezi or P. lessonae	P. perezi		-
P47	CN13276	42.3996	0.74247	Pont de Suert		Tadpole	Pelophylax sp.	P. perezi or P. lessonae	P. perezi		-
P47	CN13279	42.3996	0.74247	Pont de Suert	Male	Adult	P. perezi	P. perezi or P. lessonae	P. perezi	YES	-
P47	CN13318	42.3996	0.74247	Pont de Suert		Juvenile	P. perezi	P. perezi or P. lessonae	P. perezi	YES	-
P47	CN13320	42.3996	0.74247	Pont de Suert		Juvenile	Pelophylax sp.	P. perezi or P. lessonae	P. perezi		-
P47	CN13331	42.3996	0.74247	Pont de Suert		Tadpole	Pelophylax sp.	P. perezi or P. lessonae	P. perezi		-
P47	CN13365	42.3996	0.74247	Pont de Suert		Tadpole	Pelophylax sp.	P. perezi or P. lessonae	P. perezi		-
P48	CN12100	42.5622	0.84166	Caldes de Boí		Juvenile	Pelophylax sp.	PK or P. kl. grafi or P. kl. esculentus	P. kl. grafi		-
P48	CN12114	42.5622	0.84166	Caldes de Boí		Juvenile	Pelophylax sp.	P. perezi or P. lessonae	P. perezi		-
P48	CN12890	42.5622	0.84166	Caldes de Boí		Juvenile	Pelophylax sp.	P. perezi or P. lessonae	P. perezi		-
P48	CN12933	42.5622	0.84166	Caldes de Boí		Juvenile	P. perezi	P. perezi or P. lessonae	P. perezi	YES	-
P33	CN12173	42.3524	3.06675	Albera		Tadpole	Pelophylax sp.	PK or P. kl. grafi or P. kl. esculentus	P. kl. grafi		H22
P48	CN12936	42.5622	0.84166	Caldes de Boí		Juvenile	Pelophylax sp.	P. perezi or P. lessonae	P. perezi		-
P33	CN12184	42.3524	3.06675	Albera	Male	Adult	P. kl. grafi	PK or P. kl. grafi or P. kl. esculentus	P. kl. grafi	YES	H22
P38	CN12974	42.2478	2.60437	Sadernes	Male	Adult	P. perezi	PK or P. kl. grafi or P. kl. esculentus	P. kl. grafi	NO	H22
P48	CN12951	42.5622	0.84166	Caldes de Boí	Male	Adult	P. perezi	P. perezi or P. lessonae	P. perezi	YES	-
P48	CN12952	42.5622	0.84166	Caldes de Boí	Male	Adult	P. perezi	P. perezi or P. lessonae	P. perezi	YES	-
P40	CN12993	41.9373	2.32461	Folgueroles	Female	Adult	P. kl. grafi	PK or P. kl. grafi or P. kl. esculentus	P. kl. grafi	YES	H22
P41	CN12979	42.1834	2.1663	Ripoll	Female	Adult	P. kl. grafi	PK or P. kl. grafi or P. kl. esculentus	P. kl. grafi	YES	H22
P42	CN13334	42.0062	1.21639	Baronia de Rialb	Female	Adult	P. kl. grafi	PK or P. kl. grafi or P. kl. esculentus	P. kl. grafi	YES	H22
P46	CN13001	42.715	0.77438	Vielha		Juvenile	Pelophylax sp.	PK or P. kl. grafi or P. kl. esculentus	P. kl. grafi		H22
P50	CN12103	42.6171	1.12172	Esterri d'Àneu	Female	Adult	P. perezi	P. perezi or P. lessonae	P. perezi	YES	-
P46	CN13200	42.715	0.77438	Vielha		Juvenile	Pelophylax sp.	PK or P. kl. grafi or P. kl. esculentus	P. kl. grafi		H22
P50	CN12935	42.6171	1.12172	Esterri d'Àneu	Female	Adult	P. perezi	P. perezi or P. lessonae	P. perezi	YES	-
P51	CN12879	41.9354	0.71183	Tartareu		Juvenile	P. perezi	P. perezi or P. lessonae	P. perezi	YES	-
P51	CN12888	41.9354	0.71183	Tartareu	Female	Adult	P. perezi	P. perezi or P. lessonae	P. perezi	YES	-
P51	CN12889	41.9354	0.71183	Tartareu	Male	Adult	P. perezi	P. perezi or P. lessonae	P. perezi	YES	-
P51	CN12904	41.9354	0.71183	Tartareu		Juvenile	P. perezi	P. perezi or P. lessonae	P. perezi	YES	-
P51	CN12924	41.9354	0.71183	Tartareu		Juvenile	P. perezi	P. perezi or P. lessonae	P. perezi	YES	-
P51	CN12961	41.9354	0.71183	Tartareu	Female	Adult	P. perezi	P. perezi or P. lessonae	P. perezi	YES	-
P51	CN12967	41.9354	0.71183	Tartareu	Male	Adult	P. perezi	P. perezi or P. lessonae	P. perezi	YES	-
P52	CN12105	41.9306	0.73546	Tartareu	Male	Adult	P. perezi	P. perezi or P. lessonae	P. perezi	YES	-
P52	CN12927	41.9306	0.73546	Tartareu	Male	Adult	P. perezi	P. perezi or P. lessonae	P. perezi	YES	-
P46	CN13204	42.715	0.77438	Vielha		Juvenile	Pelophylax sp.	PK or P. kl. grafi or P. kl. esculentus	P. kl. grafi		H22
P53	CN13257	41.6604	2.52494	Parc del Montegre-Corredor, El Garrell	Male	Adult	P. kl. grafi	PK or P. kl. grafi or P. kl. esculentus	P. kl. grafi	YES	-
P46	CN13254	42.715	0.77438	Vielha		Juvenile	Pelophylax sp.	PK or P. kl. grafi or P. kl. esculentus	P. kl. grafi		H22
P46	CN13366	42.715	0.77438	Vielha		Juvenile	P. perezi	PK or P. kl. grafi or P. kl. esculentus	P. kl. grafi	NO	H22
P53	CN13262	41.6604	2.52494	Parc del Montegre-Corredor, El Garrell	Male	Adult	P. perezi	P. perezi or P. lessonae	P. perezi	YES	-
P46	CN13374	42.715	0.77438	Vielha		Juvenile	Pelophylax sp.	PK or P. kl. grafi or P. kl. esculentus	P. kl. grafi		H22
P46	CN13375	42.715	0.77438	Vielha		Juvenile	Pelophylax sp.	PK or P. kl. grafi or P. kl. esculentus	P. kl. grafi		H22
P46	CN13376	42.715	0.77438	Vielha		Juvenile	Pelophylax sp.	PK or P. kl. grafi or P. kl. esculentus	P. kl. grafi		H22
P48	CN12934	42.5622	0.84166	Caldes de Boí		Juvenile	Pelophylax sp.	PK or P. kl. grafi or P. kl. esculentus	P. kl. grafi		H22
P48	CN12941	42.5622	0.84166	Caldes de Boí		Juvenile	Pelophylax sp.	PK or P. kl. grafi or P. kl. esculentus	P. kl. grafi		H22
P48	CN12949	42.5622	0.84166	Caldes de Boí		Tadpole	Pelophylax sp.	PK or P. kl. grafi or P. kl. esculentus	P. kl. grafi		H22
P53	CN13308	41.6604	2.52494	Parc del Montegre-Corredor, El Garrell	Male	Adult	P. perezi	PK or P. kl. grafi or P. kl. esculentus	P. kl. grafi	NO	-
P48	CN12962	42.5622	0.84166	Caldes de Boí		Juvenile	Pelophylax sp.	PK or P. kl. grafi or P. kl. esculentus	P. kl. grafi		H22
P53	CN13311	41.6604	2.52494	Parc del Montegre-Corredor, El Garrell	Male	Adult	P. kl. grafi	PK or P. kl. grafi or P. kl. esculentus	P. kl. grafi	YES	-
P53	CN13314	41.6604	2.52494	Parc del Montegre-Corredor, El Garrell	Male	Adult	P. kl. grafi	PK or P. kl. grafi or P. kl. esculentus	P. kl. grafi	YES	-
P53	CN13315	41.6604	2.52494	Parc del Montegre-Corredor, El Garrell	Male	Adult	P. perezi	PK or P. kl. grafi or P. kl. esculentus	P. kl. grafi	NO	-
P49	CN12891	42.4036	1.13628	Sort		Juvenile	P. perezi	PK or P. kl. grafi or P. kl. esculentus	P. kl. grafi	NO	H22
P49	CN12948	42.4036	1.13628	Sort		Juvenile	P. perezi	PK or P. kl. grafi or P. kl. esculentus	P. kl. grafi	NO	H22
P53	CN13350	41.6604	2.52494	Parc del Montegre-Corredor, El Garrell	Male	Adult	P. kl. grafi	P. perezi or P. lessonae	P. perezi	NO	-
P53	CN13351	41.6604	2.52494	Parc del Montegre-Corredor, El Garrell	Male	Adult	P. kl. grafi	P. perezi or P. lessonae	P. perezi	NO	-
P53	CN13352	41.6604	2.52494	Parc del Montegre-Corredor, El Garrell	Male	Adult	P. kl. grafi	PK or P. kl. grafi or P. kl. esculentus	P. kl. grafi	YES	-
P49	CN12959	42.4036	1.13628	Sort		Juvenile	P. perezi	PK or P. kl. grafi or P. kl. esculentus	P. kl. grafi	NO	H22
P50	CN12931	42.6171	1.12172	Esterri d'Àneu	Female	Adult	P. perezi	PK or P. kl. grafi or P. kl. esculentus	P. kl. grafi	NO	H22
P36	CN13046	42.1744	2.82366	Esponellà		Juvenile	Pelophylax sp.	PK or P. kl. grafi or P. kl. esculentus	P. kl. grafi		H21 (PQ871203)
P24	CN12192	41.5603	2.23089	Parets del Vallès		Juvenile	P. perezi	Undetermined	P. kl. grafi	NO	H3
P24	CN12248	41.5603	2.23089	Parets del Vallès	Male	Adult	P. perezi	PK or P. kl. grafi or P. kl. esculentus	P. kl. grafi	NO	H3
P24	CN12257	41.5603	2.23089	Parets del Vallès	Male	Adult	P. perezi	PK or P. kl. grafi or P. kl. esculentus	P. kl. grafi	NO	H3
P24	CN12263	41.5603	2.23089	Parets del Vallès	Female	Adult	P. perezi	PK or P. kl. grafi or P. kl. esculentus	P. kl. grafi	NO	H3
P53	CN13410	41.6604	2.52494	Parc del Montegre-Corredor, El Garrell	Male	Adult	P. kl. grafi	PK or P. kl. grafi or P. kl. esculentus	P. kl. grafi	YES	-
P53	CN13412	41.6604	2.52494	Parc del Montegre-Corredor, El Garrell	Male	Adult	P. kl. grafi	PK or P. kl. grafi or P. kl. esculentus	P. kl. grafi	YES	-
P24	CN12270	41.5603	2.23089	Parets del Vallès	Male	Adult	P. kl. grafi	PK or P. kl. grafi or P. kl. esculentus	P. kl. grafi	YES	H3
P24	CN12275	41.5603	2.23089	Parets del Vallès	Female	Adult	P. perezi	PK or P. kl. grafi or P. kl. esculentus	P. kl. grafi	NO	H3
P36	CN13058	42.1744	2.82366	Esponellà		Juvenile	Pelophylax sp.	PK or P. kl. grafi or P. kl. esculentus	P. kl. grafi		H5 (PQ871187)
P36	CN13053	42.1744	2.82366	Esponellà		Juvenile	Pelophylax sp.	PK or P. kl. grafi or P. kl. esculentus	P. kl. grafi		H9 (PQ871191)
P37	CN12981	42.3225	2.79006	Sant Llorenç de la Muga	Female	Adult	P. kl. grafi	PK or P. kl. grafi or P. kl. esculentus	P. kl. grafi	YES	H7 (PQ871189)
P43	CN12950	41.6396	0.55684	Lleida		Juvenile	Pelophylax sp.	PK or P. kl. grafi or P. kl. esculentus	P. kl. grafi		H10 (PQ871192)
P53	CN13425	41.6604	2.52494	Parc del Montegre-Corredor, El Garrell		Juvenile	P. perezi	PK or P. kl. grafi or P. kl. esculentus	P. kl. grafi	NO	-
P37	CN13057	42.3225	2.79006	Sant Llorenç de la Muga		Juvenile	Pelophylax sp.	PK or P. kl. grafi or P. kl. esculentus	P. kl. grafi		H7
P44	CN13319	42.021	1.4908	Solsona	Male	Adult	P. perezi	PK or P. kl. grafi or P. kl. esculentus	P. kl. grafi	NO	H6 (PQ871188)
P36	CN12983	42.1744	2.82366	Esponellà	Male	Adult	P. kl. grafi	PK or P. kl. grafi or P. kl. esculentus	P. kl. grafi	YES	H8
P37	CN12984	42.3225	2.79006	Sant Llorenç de la Muga		Juvenile	Pelophylax sp.	PK or P. kl. grafi or P. kl. esculentus	P. kl. grafi		H8
P37	CN12998	42.3225	2.79006	Sant Llorenç de la Muga	Female	Adult	P. perezi	PK or P. kl. grafi or P. kl. esculentus	P. kl. grafi	NO	H8
P54	CN13442	41.6656	1.98974	Parc de Sant Llorenç del Munt, La Mata		Tadpole	Pelophylax sp.	PK or P. kl. grafi or P. kl. esculentus	P. kl. grafi		H14 (PQ871196)
	CN11176						P. ridibundus	Undetermined	P. ridibundus		-
	NHMC 80.2.11.181						P. kurtmuelleri	Undetermined	P. kurtmuelleri		-
	Sa49						P. lessonae	P. perezi or P. lessonae	P. lessonae		-
